# Supplementary material for: First Large-Scale DNA Barcoding Assessment of Reptiles in the Biodiversity Hotspot of Madagascar, Based on Newly Designed COI Primers
Source: PubMed Central journal article supplement (PMC3316696; doi:10.1371/journal.pone.0034506), 2012-03-30

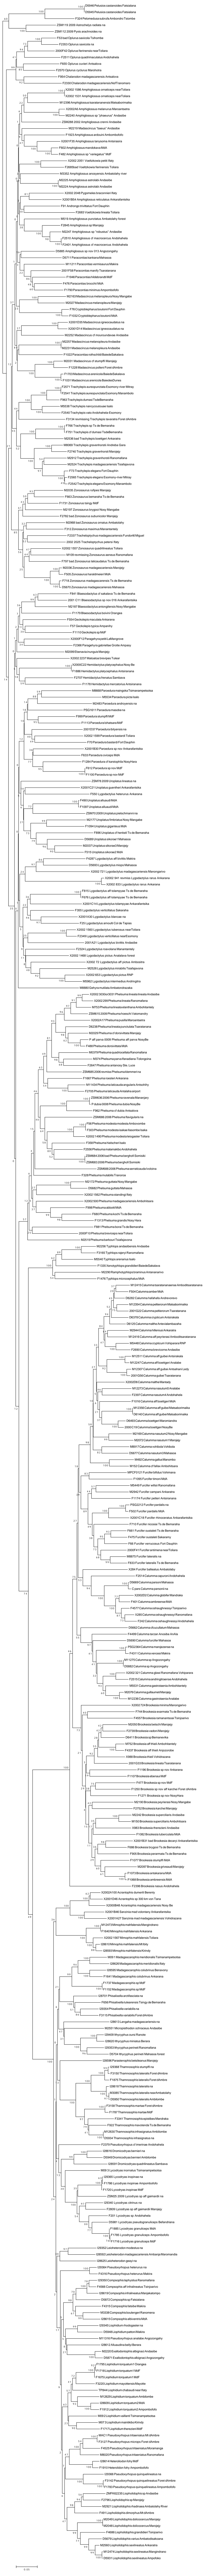

Supplement: pone.0034506.s002.pdf [file pone.0034506.s002.pdf]
